# Supplementary material
Source: PubMed Central journal article supplement (PMC6265067)
Supplement: NIHMS1509066-supplement-2.pdf [file NIHMS1509066-supplement-2.pdf]

# **SCF<sup>D3-D14</sup> Ubiquitin Ligase Exploits Structural Plasticity to Coordinate Strigolactone Perception and Signaling**

Nitzan Shabek<sup>1,2,‡</sup>, Fabrizio Ticchiarelli<sup>3</sup>, Haibin Mao<sup>1,2</sup>, Thomas R. Hinds<sup>1</sup>, Ottoline Leyser<sup>3</sup> & Ning Zheng<sup>1,2,\*</sup>

<sup>1</sup>*Department of Pharmacology and* <sup>2</sup>*Howard Hughes Medical Institute, Box 357280, University of Washington, Seattle, WA 98195.*

<sup>3</sup>*The Sainsbury Laboratory, University of Cambridge, Bateman Street, Cambridge, CB2 1LR, United Kingdom*

<sup>‡</sup> *Department of Plant biology, University of California-Davis, Davis CA 95616*

*\*Correspondence should be addressed to: [nzheng@uw.edu](mailto:nzheng@uw.edu)*

## **Supplementary Information**

1. Uncropped SDS-PAGE gel scans: Supplementary Figure 1
2. Supplementary Discussion

Supplemental Figure 1.

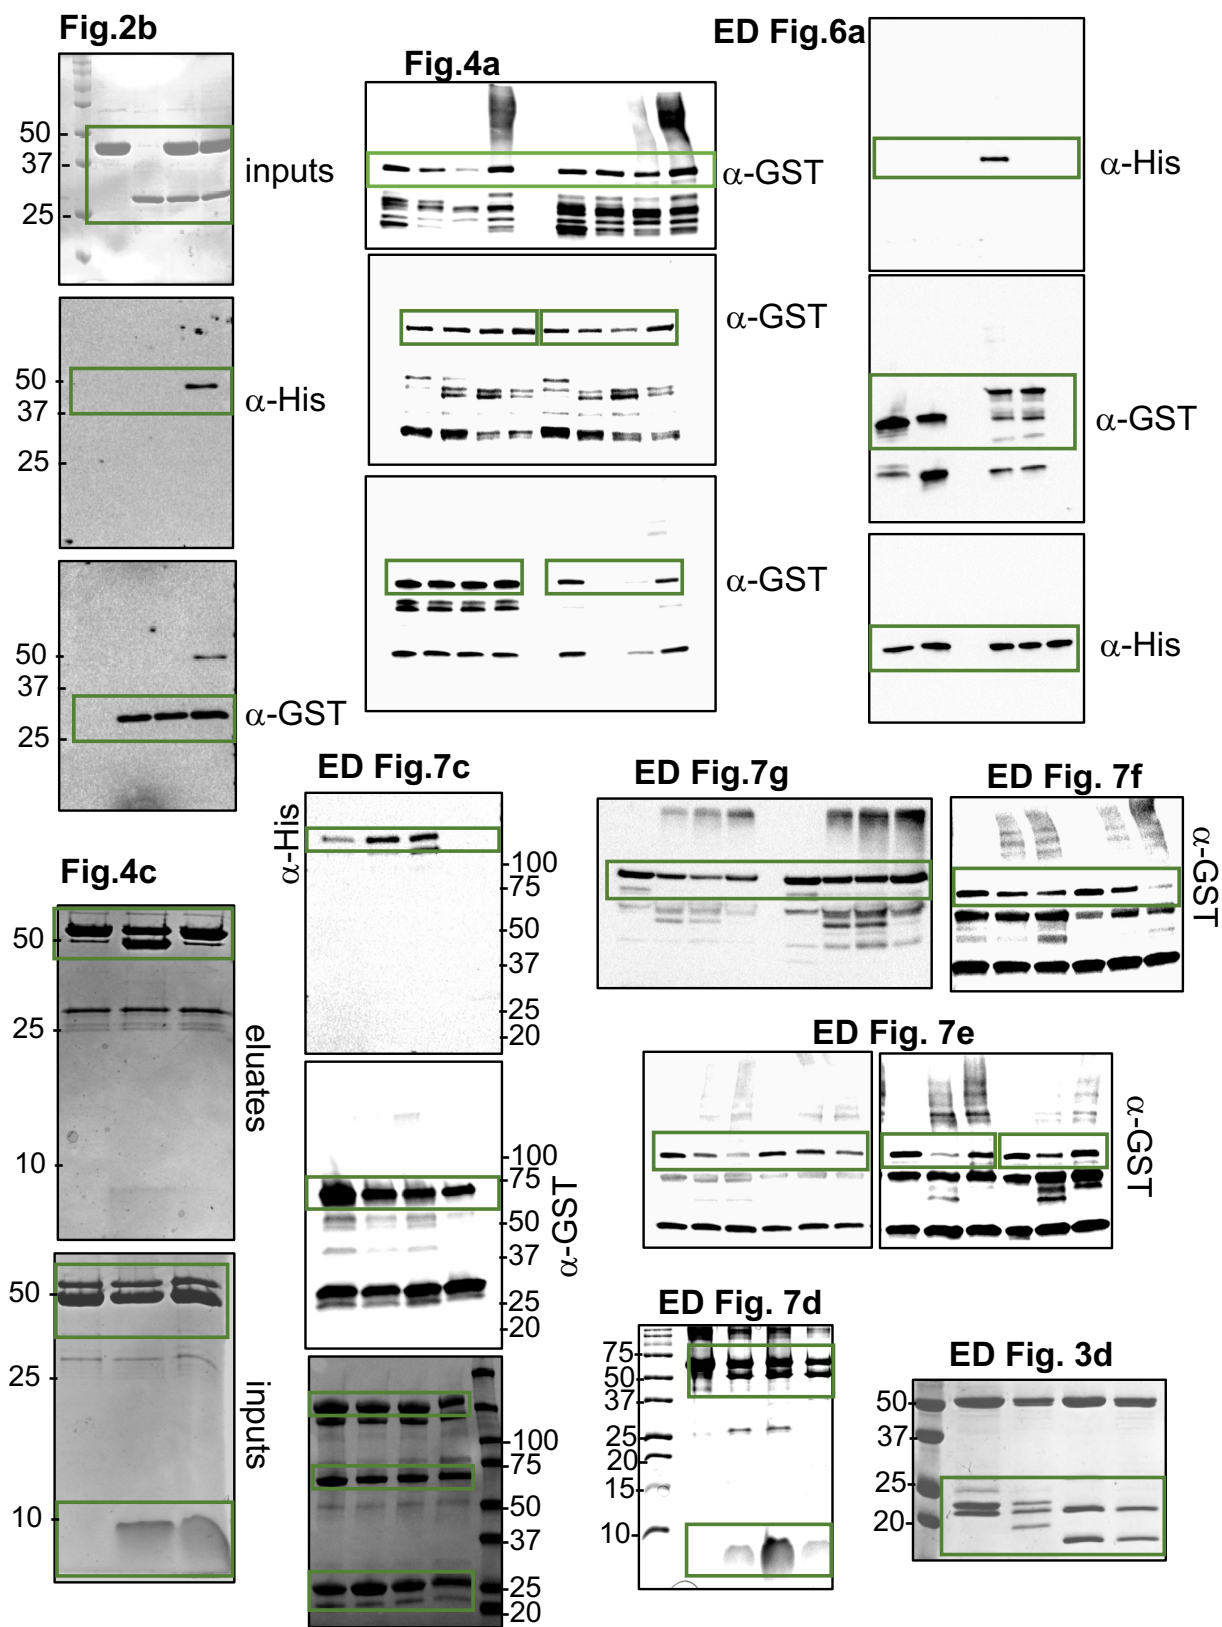

**Supplementary Figure 1. Gel source data.** Uncropped gel scans for Figure 2b, Figure 4a, Figure 4c, Extended Data Figure 3d, Extended Data Figure 6a, Extended Data Figure 7c-g. Where indicated, size marker represents molecular weight in kDa. Green box indicates gel region used for figures.

## Supplementary Discussion

1. Our analysis of YLG-induced assembly of the SCF<sup>D3-D14</sup>-D53-D2 complex and its stalled D14 activity suggest that the inactive CLIM-bound form of D14 stabilized by D3-ASK1 might be able to engage D53 (Extended Data Figure 7i). While we cannot rule out the possibility that CLIM-bound D14 in its closed conformation represents another signaling-competent form of the hydrolase, its binding mode to D53 is most likely to be distinct from that of D3-CTH-bound D14 in its open conformation. This is expected because D53-D14 interaction depends on SL and a mutant D14 defective in adopting the closed conformation has an intact hormone-dependent D53 binding activity<sup>1</sup>. Structural analysis of D53-loaded SCF<sup>D3-D14</sup> complexes induced by both hydrolysable and non-hydrolyzable SL mimetics will shed a light on the mechanism of action of natural hormone. Of note, mutual stabilization of CLIM-bound D14 and D3 with its retrieved CTH might also convert the SCF<sup>D3-D14</sup> complex into an inactivated state, which is able to present D14 for poly-ubiquitination and degradation<sup>2,3</sup>.

2. The C-terminal residue of an LRR-type F-box protein is rarely conserved among different orthologs, unless it is critically involved in the regulation of the SCF substrate receptor function<sup>4</sup>. The unique pocket on D3-ASK1 that anchors the invariant D3 extreme C-terminal Asp residue hints at a regulatory site, where a putative second signaling molecule could bind and modulate the topology of D3-CTH (Extended Data Fig. 1a-c). Such a regulatory mechanism of the SCF<sup>D3-D14</sup> E3 would be analogous to the potentiation of SCF<sup>TIR1</sup> and SCF<sup>COII</sup> by inositol polyphosphate cofactors for perceiving the phytohormones auxin and jasmonate<sup>5,6</sup>.

## Supplementary References

- 1 Yao, R. *et al.* DWARF14 is a non-canonical hormone receptor for strigolactone. *Nature* **536**, 469-473, doi:10.1038/nature19073 (2016).
- 2 Chevalier, F. *et al.* Strigolactone promotes degradation of DWARF14, an alpha/beta hydrolase essential for strigolactone signaling in Arabidopsis. *Plant Cell* **26**, 1134-1150, doi:10.1105/tpc.114.122903 (2014).
- 3 Hu, Q. *et al.* DWARF14, A Receptor Covalently Linked with the Active Form of Strigolactones, Undergoes Strigolactone-Dependent Degradation in Rice. *Front Plant Sci* **8**, 1935, doi:10.3389/fpls.2017.01935 (2017).
- 4 Xing, W. *et al.* SCF(FBXL3) ubiquitin ligase targets cryptochromes at their cofactor pocket. *Nature* **496**, 64-68.
- 5 Tan, X. *et al.* Mechanism of auxin perception by the TIR1 ubiquitin ligase. *Nature* **446**, 640-645, doi:10.1038/nature05731 (2007).
- 6 Sheard, L. B. *et al.* Jasmonate perception by inositol-phosphate-potentiated COI1-JAZ co-receptor. *Nature* **468**, 400-405, doi:10.1038/nature09430 (2010).
